# Supplementary material
Source: PubMed Central journal article supplement (PMC3985514)
Supplement: bi4013897_si_001.pdf [file bi4013897_si_001.pdf]

## Supporting information

### A

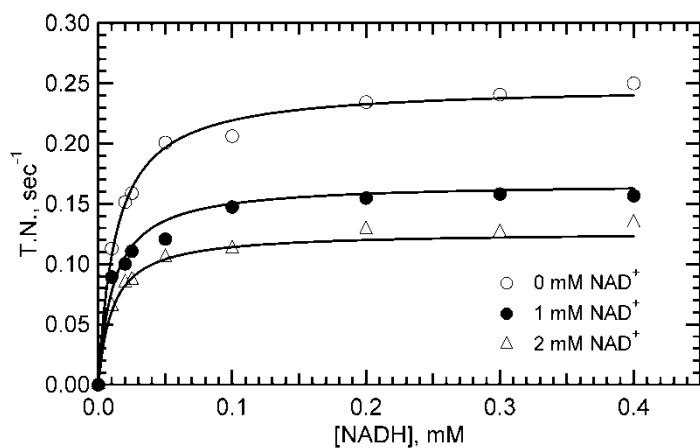

### C

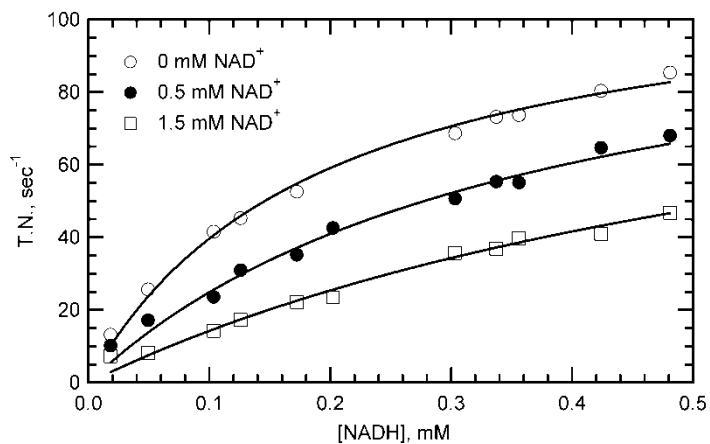

### B

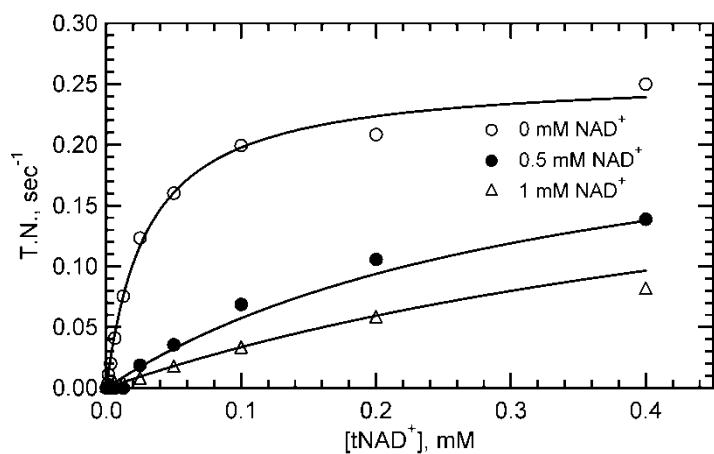

### D

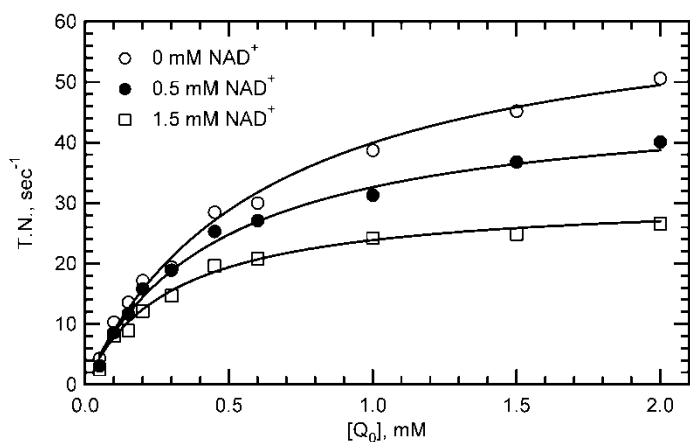

**Figure S1.** Kinetics of  $\text{NAD}^+$  inhibition for  $\text{NADH-tNAD}^+$  transhydrogenase and  $\text{NADH-UQ}_0$  reductase activities as same as Figure 4 except that data were presented as s-v plots. Data were globally fit using the same parameters used in Figure 4.

## Kinetic parameters for the ping-pong mechanism

Kinetic parameters for the NADH-Q reductase and transhydrogenase reactions are defined as shown below based on rate constants for microscopic steps of each reaction depicted in Scheme S1. In the NADH-Q reductase reaction, the second half-reaction (Q reduction) is much faster than the first-half reaction ( $k_7 \gg k_3$ ). Hence,  $K_M^{\text{NADH}}$  for the NADH-Q reductase reaction can be simplified to  $K_M^{\text{NADH}} \approx \frac{k_2+k_3}{k_1}$ . For the transhydrogenase reaction,  $K_M^{\text{NADH(Trans)}} = \frac{k_2+k_3}{k_1} \times \frac{k_{11}}{k_3+k_{11}} = K_M^{\text{NADH(N-Q)}} \times \frac{k_{11}}{k_3+k_{11}}$ . If hydride transfer from  $\text{FADH}_2$  to  $\text{tNAD}^+$  is rate-limiting, then  $k_3 \gg k_{11}$  can account for the lower  $K_M^{\text{NADH}}$  for NADH in the transhydrogenase reaction than is observed in the NADH-Q reductase reaction. These assumptions further result in  $K_M^{\text{Q}} \approx \frac{k_2(k_6+k_7)}{k_7k_3}$  and  $K_M^{\text{tNAD}^+} \approx \frac{k_{10}+k_{11}}{k_9}$ . The affinity of Q for the enzyme is most likely influenced by the off rate,  $k_6$ . We have observed a clear tendency that the  $K_M^{\text{Q}}$  values are much smaller if quinone has a longer isoprenoid chain,  $K_M^{\text{UQ}_2} < K_M^{\text{UQ}_1} < K_M^{\text{UQ}_0}$ , suggesting that the isoprenoid chain plays dominant role in substrate binding and dissociation kinetics.

Scheme S1

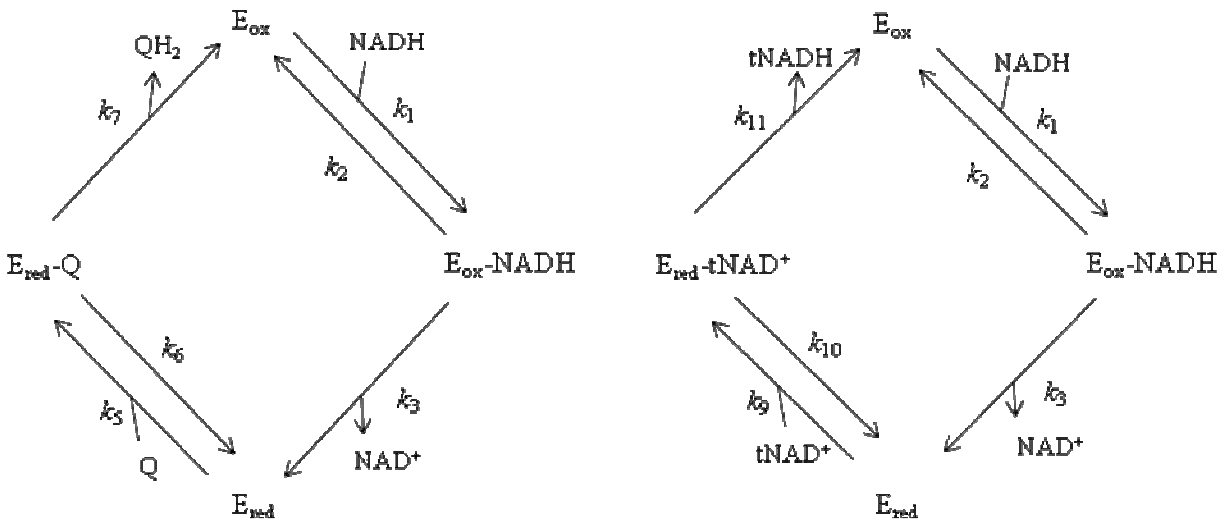

Table S1

|                | NADH-Q reductase reaction                 | NADH-tNAD <sup>+</sup><br>Transhydrogenase reaction |
|----------------|-------------------------------------------|-----------------------------------------------------|
| $k_{cat}$      | $\frac{k_3 k_7}{k_3 + k_7} [E]_0$         | $\frac{k_3 k_{11}}{k_3 + k_{11}} [E]_0$             |
| $K_M^{NADH}$   | $\frac{(k_2 + k_3) k_7}{k_1 (k_3 + k_7)}$ | $\frac{(k_2 + k_3) k_{11}}{k_1 (k_3 + k_{11})}$     |
| $K_M^Q$        | $\frac{k_3 (k_6 + k_7)}{(k_3 + k_7) k_5}$ | -                                                   |
| $K_M^{tNAD^+}$ | -                                         | $\frac{k_3 (k_{10} + k_{11})}{(k_3 + k_{11}) k_9}$  |
